# Supplementary material
Source: PubMed Central journal article supplement (PMC2797877)

# Suppl. Floer et al. Fig S2

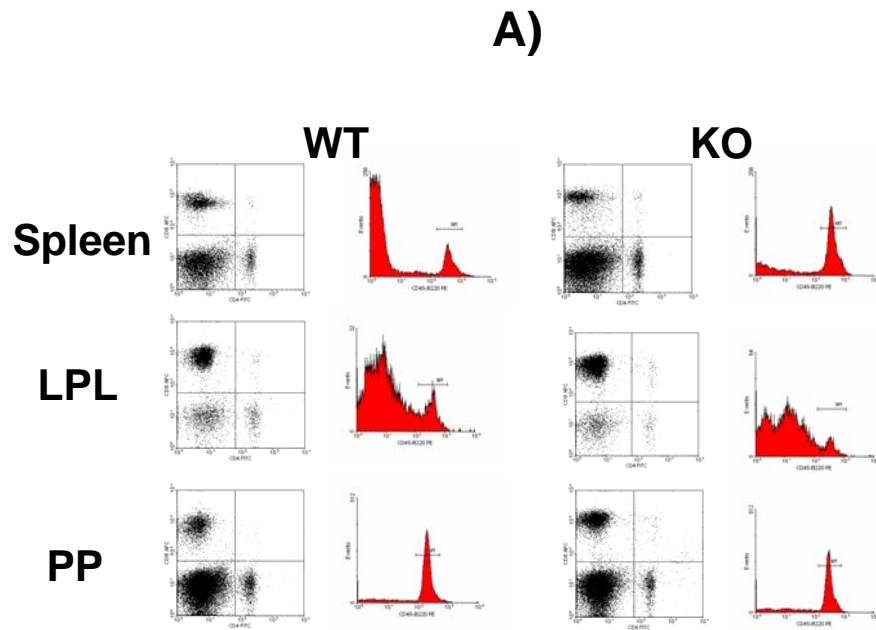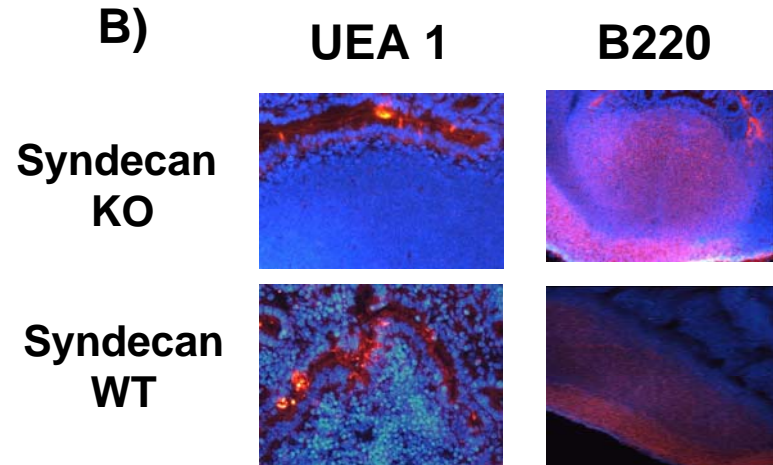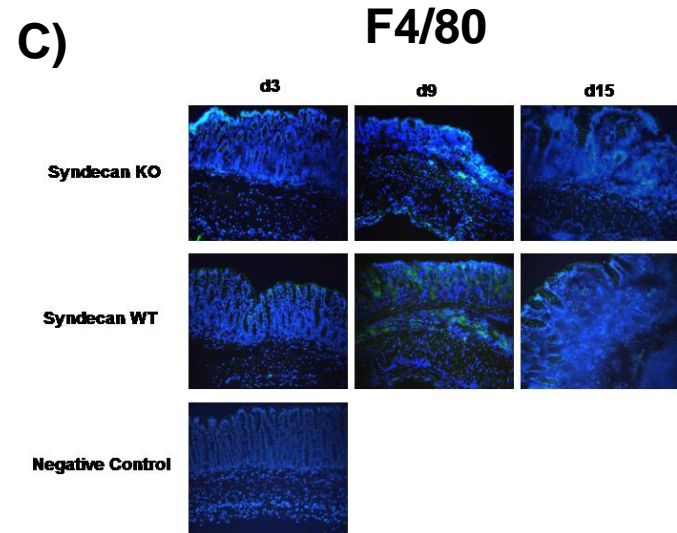

Supplement: mmc2.pdf [file mmc2.pdf]
